# Supplementary material for: The Structure and Function of Ionotropic Receptors in Drosophila
Source: Front Mol Neurosci. 2021 Feb 1;13:638839. doi: 10.3389/fnmol.2020.638839 (PMC7882480; doi:10.3389/fnmol.2020.638839)
Supplement: Supplementary file 1 [file Table_1.xlsx]

## Sheet: Sup Table 1
Sup Table 1: Expression of IRs in adult flies
IR	Antenna				Proboscis					Leg	Wing	Abdomen
	3rd segment			2nd segment	Labellum		Pharynx
	Sensilla	Sacculus	Arista		Sensilla	Peg	DCSO	VCSO	LSO
7a					(Croset et al., 2010; Sanchez-Alcaniz et al., 2018; Rimal et al., 2019)			(Sanchez-Alcaniz et al., 2018)		(Sanchez-Alcaniz et al., 2018)	(Sanchez-Alcaniz et al., 2018)	(Sanchez-Alcaniz et al., 2018)
7b											(Sanchez-Alcaniz et al., 2018)
7c					(Sanchez-Alcaniz et al., 2018)					(Sanchez-Alcaniz et al., 2018)	(Sanchez-Alcaniz et al., 2018)	(Sanchez-Alcaniz et al., 2018)
8a	(Benton et al., 2009; Abuin et al., 2011; Ai et al., 2013; Menuz et al., 2014)	(III) (Benton et al., 2009; Abuin et al., 2011; Ai et al., 2013; Menuz et al., 2014)
10a							(Sanchez-Alcaniz et al., 2018)		(Sanchez-Alcaniz et al., 2018)		(Sanchez-Alcaniz et al., 2018)	(Sanchez-Alcaniz et al., 2018)
11a					(Sanchez-Alcaniz et al., 2018)			(Croset et al., 2010; Chen and Dahanukar, 2017; Sanchez-Alcaniz et al., 2018)		(Sanchez-Alcaniz et al., 2018)		(Sanchez-Alcaniz et al., 2018)
20a							(Sanchez-Alcaniz et al., 2018)	(Koh et al., 2014; Chen and Dahanukar, 2017; Sanchez-Alcaniz et al., 2018)	(Koh et al., 2014; Chen and Dahanukar, 2017; Joseph et al., 2017; Sanchez-Alcaniz et al., 2018)	(Koh et al., 2014; Ganguly et al., 2017; Sanchez-Alcaniz et al., 2018)		(Koh et al., 2014)
21a		(III) (Benton et al., 2009)	(Benton et al., 2009; Budelli et al., 2019)
25a	(Benton et al., 2009; Abuin et al., 2011; Chen et al., 2015)	(I,II) (Benton et al., 2009; Abuin et al., 2011; Chen et al., 2015; Steck et al., 2018)	(Benton et al., 2009; Abuin et al., 2011; Chen et al., 2015; Budelli et al., 2019)	(Chen et al., 2015)	(Chen and Amrein, 2017; Lee et al., 2018; Sanchez-Alcaniz et al., 2018; Steck et al., 2018)	(Sanchez-Alcaniz et al., 2018; Steck et al., 2018)	(Chen and Dahanukar, 2017; Sanchez-Alcaniz et al., 2018)	(Chen and Dahanukar, 2017; Sanchez-Alcaniz et al., 2018; Steck et al., 2018)	(Chen and Dahanukar, 2017; Sanchez-Alcaniz et al., 2018; Steck et al., 2018)	(Chen et al., 2015; Chen and Amrein, 2017; Lee et al., 2018; Sanchez-Alcaniz et al., 2018; Steck et al., 2018)	(Sanchez-Alcaniz et al., 2018)	(Sanchez-Alcaniz et al., 2018)
31a	(Benton et al., 2009)
40a		(I,II) (Benton et al., 2009; Enjin et al., 2016; Knecht et al., 2016; Frank et al., 2017; Knecht et al., 2017)
41a	(Silbering et al., 2011)
47a					(Koh et al., 2014; Sanchez-Alcaniz et al., 2018)					(Koh et al., 2014; Sanchez-Alcaniz et al., 2018)
52a										(Koh et al., 2014; He et al., 2019)	(Koh et al., 2014; He et al., 2019)
52b										(Sanchez-Alcaniz et al., 2018)	(Sanchez-Alcaniz et al., 2018)
52c										(Koh et al., 2014; Sanchez-Alcaniz et al., 2018)	(Sanchez-Alcaniz et al., 2018)
52d										(Koh et al., 2014; Sanchez-Alcaniz et al., 2018)
56a					(Koh et al., 2014; Sanchez-Alcaniz et al., 2018)			(Sanchez-Alcaniz et al., 2018)	(Koh et al., 2014; Chen and Dahanukar, 2017; Joseph et al., 2017; Sanchez-Alcaniz et al., 2018)	(Koh et al., 2014; Sanchez-Alcaniz et al., 2018)	(Sanchez-Alcaniz et al., 2018)	(Sanchez-Alcaniz et al., 2018)
56b					(Koh et al., 2014)					(Koh et al., 2014)
56d					(Koh et al., 2014; Sanchez-Alcaniz et al., 2018)	(Koh et al., 2014; Sanchez-Alcaniz et al., 2018)				(Koh et al., 2014; Ahn et al., 2017; Sanchez-Alcaniz et al., 2018)	(Sanchez-Alcaniz et al., 2018)
60b									(Koh et al., 2014; Joseph et al., 2017)
60c					(Sanchez-Alcaniz et al., 2018)				(Sanchez-Alcaniz et al., 2018)	(Sanchez-Alcaniz et al., 2018)	(Sanchez-Alcaniz et al., 2018)
60d					(Sanchez-Alcaniz et al., 2018)				(Sanchez-Alcaniz et al., 2018)
62a										(Koh et al., 2014)
64a		(III) (Benton et al., 2009; Ai et al., 2010; Silbering et al., 2011; Ai et al., 2013; Abuin et al., 2019)
67a										(Sanchez-Alcaniz et al., 2018)
67c									(Koh et al., 2014; Chen and Dahanukar, 2017; Joseph et al., 2017; Sanchez-Alcaniz et al., 2018)
68a		(II) (Frank et al., 2017; Knecht et al., 2017)
75a	(Benton et al., 2009; Prieto-Godino et al., 2016; Prieto-Godino et al., 2017; Abuin et al., 2019)
75b	(Benton et al., 2009; Prieto-Godino et al., 2017)
75c	(Benton et al., 2009; Prieto-Godino et al., 2017; Abuin et al., 2019)
75d	(Benton et al., 2009)			(Senthilan et al., 2012)
76a	(Benton et al., 2009; Abuin et al., 2011; Menuz et al., 2014)
76b	(Benton et al., 2009; Menuz et al., 2014; Hussain et al., 2016; Steck et al., 2018)				(Zhang et al., 2013; Hussain et al., 2016; Chen and Amrein, 2017; Ganguly et al., 2017; Jaeger et al., 2018; Lee et al., 2018; Sanchez-Alcaniz et al., 2018; Steck et al., 2018)	(Ganguly et al., 2017; Sanchez-Alcaniz et al., 2018; Steck et al., 2018)	(Chen and Dahanukar, 2017; Sanchez-Alcaniz et al., 2018)	(Chen and Amrein, 2017; Chen and Dahanukar, 2017; Sanchez-Alcaniz et al., 2018; Steck et al., 2018)	(Chen and Dahanukar, 2017; Sanchez-Alcaniz et al., 2018; Steck et al., 2018)	(Zhang et al., 2013; Hussain et al., 2016; Chen and Amrein, 2017; Ganguly et al., 2017; Lee et al., 2018; Sanchez-Alcaniz et al., 2018; Steck et al., 2018)	(Zhang et al., 2013; Hussain et al., 2016; Sanchez-Alcaniz et al., 2018; Yanagawa et al., 2019)	(Sanchez-Alcaniz et al., 2018)
84a	(Benton et al., 2009; Abuin et al., 2011; Grosjean et al., 2011; Silbering et al., 2011; Abuin et al., 2019)
92a	(Benton et al., 2009; Silbering et al., 2011; Menuz et al., 2014)
93a		(I,II) (Benton et al., 2009; Enjin et al., 2016; Knecht et al., 2016; Frank et al., 2017; Knecht et al., 2017; Sun et al., 2018)	(Frank et al., 2017; Budelli et al., 2019)
94a								(Koh et al., 2014; Chen and Dahanukar, 2017; Sanchez-Alcaniz et al., 2018)	(Sanchez-Alcaniz et al., 2018)
94b				(Senthilan et al., 2012)	(Sanchez-Alcaniz et al., 2018)			(Sanchez-Alcaniz et al., 2018)
94c								(Koh et al., 2014; Chen and Dahanukar, 2017)
94e					(Koh et al., 2014; Jaeger et al., 2018; Sanchez-Alcaniz et al., 2018)				(Sanchez-Alcaniz et al., 2018)	(Sanchez-Alcaniz et al., 2018)	(Sanchez-Alcaniz et al., 2018)
94f									(Koh et al., 2014; Chen and Dahanukar, 2017; Joseph et al., 2017; Chen et al., 2019b)
94h								(Koh et al., 2014; Chen and Dahanukar, 2017)	(Koh et al., 2014; Chen and Dahanukar, 2017; Joseph et al., 2017)	(Koh et al., 2014; Sanchez-Alcaniz et al., 2018)
100a							(Croset et al., 2010; Chen and Dahanukar, 2017; Sanchez-Alcaniz et al., 2018)		(Chen and Dahanukar, 2017; Sanchez-Alcaniz et al., 2018)

## Sheet: Sup Table 2
Sup Table 2: Expression of IRs in Larvae.
IR	Anterior peripheral organs			Pharynx				Abdomen
	TOG	DOG	VOG	VPS	DPS	DPO	PPS
7a	(Croset et al., 2010; Croset et al., 2016; Rist and Thum, 2017; Sanchez-Alcaniz et al., 2018)		(Sanchez-Alcaniz et al., 2018)
7b	(Croset et al., 2016; Sanchez-Alcaniz et al., 2018)		(Sanchez-Alcaniz et al., 2018)
7d	(Croset et al., 2016; Sanchez-Alcaniz et al., 2018)							(Sanchez-Alcaniz et al., 2018)
7e	(Croset et al., 2016; Sanchez-Alcaniz et al., 2018)
7f					Ö(Sanchez-Alcaniz et al., 2018)	Ö(Sanchez-Alcaniz et al., 2018)
7g	(Croset et al., 2016; Sanchez-Alcaniz et al., 2018)		(Sanchez-Alcaniz et al., 2018)	(Sanchez-Alcaniz et al., 2018)	Ö(Sanchez-Alcaniz et al., 2018)	Ö(Sanchez-Alcaniz et al., 2018)		(Sanchez-Alcaniz et al., 2018)
10a								(Sanchez-Alcaniz et al., 2018)
11a					(Croset et al., 2010) / Ö(Sanchez-Alcaniz et al., 2018)	Ö(Sanchez-Alcaniz et al., 2018)
20a						(Stewart et al., 2015)
21a		(Knecht et al., 2016; Ni et al., 2016; Sanchez-Alcaniz et al., 2018)
25a	(Stewart et al., 2015; Croset et al., 2016; van Giesen et al., 2016; Rist and Thum, 2017; Sanchez-Alcaniz et al., 2018)	(Stewart et al., 2015; van Giesen et al., 2016; Sanchez-Alcaniz et al., 2018)	(Sanchez-Alcaniz et al., 2018)	(Stewart et al., 2015; Sanchez-Alcaniz et al., 2018)	(Stewart et al., 2015; Croset et al., 2016) / Ö(Sanchez-Alcaniz et al., 2018)	(Stewart et al., 2015) / Ö(Sanchez-Alcaniz et al., 2018)	(Stewart et al., 2015; Croset et al., 2016; Sanchez-Alcaniz et al., 2018)	(Stewart et al., 2015; Sanchez-Alcaniz et al., 2018)
47a	(Stewart et al., 2015)
48b					Ö(Sanchez-Alcaniz et al., 2018)	Ö(Sanchez-Alcaniz et al., 2018)
48c					(Stewart et al., 2015) / Ö(Sanchez-Alcaniz et al., 2018)	Ö(Sanchez-Alcaniz et al., 2018)
51b					Ö(Sanchez-Alcaniz et al., 2018)	Ö(Sanchez-Alcaniz et al., 2018)
56a								(Stewart et al., 2015)
56c	(Croset et al., 2016; Sanchez-Alcaniz et al., 2018)
60b			(Sanchez-Alcaniz et al., 2018)	(Stewart et al., 2015)	(Stewart et al., 2015)
60c	(Croset et al., 2016; Rist and Thum, 2017; Sanchez-Alcaniz et al., 2018)				Ö(Sanchez-Alcaniz et al., 2018)	Ö(Sanchez-Alcaniz et al., 2018)
60d					Ö(Sanchez-Alcaniz et al., 2018)	Ö(Sanchez-Alcaniz et al., 2018)
60e					(Stewart et al., 2015) / Ö(Sanchez-Alcaniz et al., 2018)	Ö(Sanchez-Alcaniz et al., 2018)
67a			(Sanchez-Alcaniz et al., 2018)
67b					(Stewart et al., 2015) / Ö(Sanchez-Alcaniz et al., 2018)	Ö(Sanchez-Alcaniz et al., 2018)		(Stewart et al., 2015)
67c					(Stewart et al., 2015) / Ö(Sanchez-Alcaniz et al., 2018)	Ö(Sanchez-Alcaniz et al., 2018)
68a		(Sanchez-Alcaniz et al., 2018)
68b								(Sanchez-Alcaniz et al., 2018)
76b	(Stewart et al., 2015; Croset et al., 2016; Rist and Thum, 2017; Sanchez-Alcaniz et al., 2018)	(Stewart et al., 2015)	(Sanchez-Alcaniz et al., 2018)	(Stewart et al., 2015; Sanchez-Alcaniz et al., 2018)	(Stewart et al., 2015; Croset et al., 2016) / Ö(Sanchez-Alcaniz et al., 2018)	(Stewart et al., 2015) / Ö(Sanchez-Alcaniz et al., 2018)	(Stewart et al., 2015; Croset et al., 2016; Sanchez-Alcaniz et al., 2018)
85a								(Sanchez-Alcaniz et al., 2018)
92a		(Sanchez-Alcaniz et al., 2018)			Ö(Sanchez-Alcaniz et al., 2018)	Ö(Sanchez-Alcaniz et al., 2018)	(Sanchez-Alcaniz et al., 2018)
93a		(Knecht et al., 2016; Sanchez-Alcaniz et al., 2018)
94a					Ö(Sanchez-Alcaniz et al., 2018)	Ö(Sanchez-Alcaniz et al., 2018)
94b					Ö(Sanchez-Alcaniz et al., 2018)	Ö(Sanchez-Alcaniz et al., 2018)
94d								(Stewart et al., 2015)
94e	(Croset et al., 2016; Sanchez-Alcaniz et al., 2018)
94f					(Stewart et al., 2015)
94g					Ö(Sanchez-Alcaniz et al., 2018)	Ö(Sanchez-Alcaniz et al., 2018)	(Sanchez-Alcaniz et al., 2018)
94h	(Croset et al., 2016; Sanchez-Alcaniz et al., 2018)				(Stewart et al., 2015)
100a					Ö(Sanchez-Alcaniz et al., 2018)	Ö(Sanchez-Alcaniz et al., 2018)	(Croset et al., 2010; Sanchez-Alcaniz et al., 2018)
Ö(Sanchez-Alcaniz et al., 2018) did not distinguish DPS and DPO.
